1 **Testing ecological hypotheses at the pondscape with**  
2 **environmental DNA metabarcoding: a case study on a**  
3 **threatened amphibian**

4  
5 **Lynsey R. Harper<sup>1\*</sup>, Lori Lawson Handley<sup>1</sup>, Christoph Hahn<sup>1,2</sup>, Neil Boonham<sup>3,4</sup>,**  
6 **Helen C. Rees<sup>5</sup>, Erin Lewis<sup>3</sup>, Ian P. Adams<sup>3</sup>, Peter Brotherton<sup>6</sup>, Susanna**  
7 **Phillips<sup>6</sup> and Bernd Hänfling<sup>1</sup>**

8  
9 <sup>1</sup>Department of Biological and Marine Sciences, University of Hull, Hull, HU6 7RX, UK

10 <sup>2</sup>Institute of Zoology, University of Graz, Graz, Styria, Austria

11 <sup>3</sup>Fera Science Ltd (Fera), Sand Hutton, York, YO14 1LZ, UK

12 <sup>4</sup>Newcastle University, Newcastle upon Tyne, NE1 7RU, UK

13 <sup>5</sup>ADAS, School of Veterinary Medicine and Science, The University of Nottingham, Sutton Bonington Campus,  
14 Leicestershire, LE12 5RD, UK

15 <sup>6</sup>Natural England, Peterborough, PE1 1NG, UK

16

17

18 **\*Corresponding author: Lynsey R. Harper**

19 Department of Biological and Marine Sciences, University of Hull, Hull, HU6 7RX, UK

20 E-mail: [lynsey.harper2@gmail.com](mailto:lynsey.harper2@gmail.com)

21

22 **Running title:** Hypothesis testing with eDNA metabarcoding

23

## 24 **Abstract**

25

26 Environmental DNA (eDNA) metabarcoding is revolutionising biodiversity monitoring, but has unrealised  
27 potential for ecological hypothesis testing. Here, we validate this potential in a large-scale analysis of  
28 vertebrate community data generated by eDNA metabarcoding of 532 UK ponds. We test biotic associations  
29 between the threatened great crested newt (*Triturus cristatus*) and other vertebrates as well as abiotic factors  
30 influencing *T. cristatus* occupancy at the pondscape. Furthermore, we test the status of *T. cristatus* as an  
31 umbrella species for pond conservation by assessing whether vertebrate species richness is greater in ponds  
32 with *T. cristatus* and higher *T. cristatus* Habitat Suitability Index (HSI) scores. *T. cristatus* occupancy was  
33 positively correlated with amphibian and waterfowl species richness. Specifically, *T. cristatus* was positively  
34 associated with smooth newt (*Lissotriton vulgaris*), common coot (*Fulica atra*), and common moorhen  
35 (*Gallinula chloropus*), but negatively associated with common toad (*Bufo bufo*). *T. cristatus* occupancy did not  
36 significantly decrease as fish species richness increased, but negative associations with common carp (*Cyprinus*  
37 *carpio*), three-spined stickleback (*Gasterosteus aculeatus*) and ninespine stickleback (*Pungitius pungitius*) were  
38 identified. *T. cristatus* occupancy was negatively correlated with mammal species richness, and *T. cristatus* was  
39 negatively associated with grey squirrel (*Sciurus carolinensis*). *T. cristatus* occupancy was negatively influenced  
40 by larger pond area, presence of inflow, and higher percentage of shading, but positively correlated with HSI  
41 score, supporting its application to *T. cristatus* survey. Vertebrate species richness was significantly higher in *T.*  
42 *cristatus* ponds and broadly increased as *T. cristatus* HSI scores increased. We reaffirm reported associations  
43 (e.g. *T. cristatus* preference for smaller ponds) but also provide novel insights, including a negative effect of  
44 pond inflow on *T. cristatus*. Our findings demonstrate the prospects of eDNA metabarcoding for ecological  
45 hypothesis testing at landscape scale and dramatic enhancement of freshwater conservation, management,  
46 monitoring and research.

47

48 **Keywords:** biodiversity assessment, environmental DNA (eDNA), hypothesis testing,  
49 metabarcoding, ponds, species associations, *Triturus cristatus*

50

## 51 **1. Introduction**

52

53 Environmental DNA (eDNA) analysis offers ecologists exceptional power to detect organisms  
54 within and across ecosystems. DNA released by organisms into their environment via  
55 secretions, excretions, gametes, blood, or decomposition, can be sampled and analysed  
56 using different approaches to reveal the distribution of single or multiple species (Rees et  
57 al., 2014; Lawson Handley, 2015). eDNA analysis combined with high-throughput  
58 sequencing (i.e. eDNA metabarcoding) can yield efficient, comprehensive assessments of  
59 entire communities (Deiner et al., 2017), providing a step change in biodiversity monitoring  
60 (Hering et al., 2018). eDNA metabarcoding has untapped potential to test ecological  
61 hypotheses by enabling biodiversity monitoring at landscape scale with minimal impact to  
62 communities under investigation. This potential has already been demonstrated with  
63 targeted eDNA analysis by Wilcox et al. (2018), where climate-mediated responses of bull  
64 trout (*Salvelinus confluentus*) to biotic and abiotic factors were revealed using quantitative  
65 PCR (qPCR) on crowd-sourced eDNA samples. Although eDNA metabarcoding assessments  
66 of alpha and beta diversity along environmental gradients are increasing (e.g. Hänfling et al.,  
67 2016; Olds et al., 2016; Kelly et al., 2016; Evans et al., 2017; Li et al., 2018a; Nakagawa et al.,  
68 2018), this tool is less commonly used for ecological hypothesis testing, such as the impact  
69 of environmental stressors (Li et al., 2018b; Macher et al., 2018).

70 Aquatic ecosystems are highly suited to eDNA studies as eDNA exists in multiple  
71 states with rapid modes of transport and degradation, increasing detectability of  
72 contemporary biodiversity (Rees et al., 2014; Barnes & Turner, 2015). Lentic systems  
73 provide further opportunities for eDNA research, being discrete water bodies with variable  
74 physicochemical properties that do not experience flow dynamics (Harper et al., 2019).

75 Ponds in particular have enormous biodiversity and experimental virtue that has not been  
76 maximised in previous eDNA metabarcoding assessments of this habitat (Valentini et al.,  
77 2016; Evans et al., 2017; Klymus et al., 2017; Ushio et al., 2017; Bálint et al., 2018). These  
78 small and abundant water bodies span broad ecological gradients (De Meester et al., 2005)  
79 and comprise pondscapes - a network of ponds and their surrounding terrestrial habitat (Hill  
80 et al., 2018). Pondscapes contribute substantially to aquatic and non-aquatic biodiversity  
81 across spatial scales, with ponds supporting many rare and protected species in fragmented  
82 landscapes (De Meester et al., 2005; Biggs et al., 2016; Hill et al., 2018). Consequently,  
83 ponds are model systems for experimental validation and examination of biogeographical  
84 patterns (De Meester et al., 2005). Habitat complexity and tools required for different taxa  
85 with associated bias (Evans et al., 2017) and cost (Valentini et al., 2016) once hindered  
86 exhaustive sampling of pond biodiversity (Hill et al., 2018), but eDNA metabarcoding may  
87 overcome these barriers (Harper et al., 2019).

88 In the UK, the threatened great crested newt (*Triturus cristatus*) is an umbrella  
89 species for pond conservation. The extensive literature on *T. cristatus* ecology provides an  
90 excellent opportunity to validate ecological patterns revealed by eDNA metabarcoding. Both  
91 biotic (e.g. breeding substrate, prey, and predators) and abiotic (e.g. pond area, depth, and  
92 temperature) factors are known to influence *T. cristatus* breeding success (Langton, Beckett  
93 & Foster, 2001). The *T. cristatus* Habitat Suitability Index (HSI [Oldham et al., 2000; ARG-UK,  
94 2010]) accounts for these factors using 10 suitability indices that are scored and combined  
95 to calculate a decimal score between 0 and 1 (where 1 = excellent habitat). Larvae are  
96 susceptible to fish and waterfowl predation (Edgar & Bird, 2006; Rannap & Briggs, 2006;  
97 Skei et al., 2006; Hartel, Nemes & Oellerer, 2010), and adults reportedly avoid ponds  
98 containing three-spined stickleback (*Gasterosteus aculeatus*) (McLee & Scaife, 1992),

99 ninespine stickleback (*Pungitius pungitius*), crucian carp (*Carassius carassius*), and common  
100 carp (*Carassius carpio*) (Rannap, Lõhmus & Briggs, 2009a, b). Conversely, *T. cristatus* and  
101 smooth newt (*Lissotriton vulgaris*) prefer similar habitat and often co-occur (Rannap &  
102 Briggs, 2006; Skei et al., 2006; Rannap et al., 2009a; Denoël et al., 2013; Cayuela et al.,  
103 2018). *T. cristatus* individuals thrive in ponds with good water quality as indicated by diverse  
104 macroinvertebrate communities (Oldham et al., 2000; Rannap et al., 2009a), and water  
105 clarity is important for breeding displays, foraging success, and egg survival (Rannap &  
106 Briggs, 2006; Skei et al., 2006). Pond networks encourage *T. cristatus* occupancy (Joly et al.,  
107 2001; Rannap et al., 2009a; Hartel et al., 2010; Denoël et al., 2013), but larger pond area  
108 discourages presence (Joly et al., 2001). Ponds with heavy shading (Vuorio, Heikkinen &  
109 Tikkanen, 2013) or dense macrophyte cover (Rannap & Briggs, 2006; Skei et al., 2006; Hartel  
110 et al., 2010) are unlikely to support viable populations. *T. cristatus* individuals also depend  
111 on terrestrial habitat, preferring open, semi-rural ponds (Denoël et al., 2013)  
112 containing pasture, extensively grazed and rough grassland, scrub, and coniferous and  
113 deciduous woodland (Oldham et al., 2000; Rannap & Briggs, 2006; Rannap et al., 2009a;  
114 Gustafson, Malmgren & Mikusiński, 2011; Vuorio et al., 2013).

115 We assessed vertebrate communities at the pondscape using a dataset generated by  
116 eDNA metabarcoding for over 500 ponds with comprehensive environmental metadata. We  
117 validated eDNA metabarcoding as a tool for ecological hypothesis testing, and compared its  
118 outputs to previous results generated by established methods. Specifically, we tested biotic  
119 (community presence-absence data) and abiotic (environmental metadata on ponds and  
120 surrounding terrestrial habitat) determinants of *T. cristatus* at the pondscape - an  
121 impractical task by conventional means. Furthermore, we tested the applicability of the HSI  
122 to predict eDNA-based *T. cristatus* occupancy. Finally, we assessed the umbrella species

123 status of *T. cristatus* by investigating whether *T. cristatus* presence and the *T. cristatus* HSI  
124 score can predict vertebrate species richness of ponds.

125

126

## 127 **2. Materials and methods**

128

### 129 **2.1 Samples**

130

131 We repurposed the taxonomically assigned sequence reads from Harper et al. (2018) that  
132 were produced using eDNA metabarcoding of pond water to compare qPCR and eDNA  
133 metabarcoding for *T. cristatus* detection. Samples from 508 ponds included in Natural  
134 England's Great Crested Newt Evidence Enhancement Programme were processed using  
135 eDNA metabarcoding alongside 24 privately surveyed ponds. Water samples were collected  
136 using established methodology (Biggs et al., 2015), detailed in Supporting Information:  
137 Appendix 1. Briefly, 20 x 30 mL water samples were collected from each pond and pooled.  
138 Six 15 mL subsamples were taken from the pooled sample and each added to 33.5 mL  
139 absolute ethanol and 1.5 mL sodium acetate 3 M (pH 5.2). Subsamples were pooled during  
140 DNA extraction to produce one eDNA sample per pond. Targeted qPCR detected *T. cristatus*  
141 in 265 (49.81%) ponds (Harper et al., 2018).

142 Environmental metadata (Table S1) were collected for 504 of 532 ponds (Fig. S1) by  
143 environmental consultants contracted for Natural England's Great Crested Newt Evidence  
144 Enhancement Programme. Metadata included: maximum depth of ponds; pond  
145 circumference; pond width; pond length; pond area; pond density (i.e. number of ponds per  
146 km<sup>2</sup>); terrestrial overhang; shading; macrophyte cover; HSI score (Oldham et al., 2000); HSI

147 band (categorical classification of HSI score [ARG-UK, 2010]); pond permanence; water  
148 quality; pond substrate; presence of inflow or outflow; presence of pollution; presence of  
149 other amphibians, fish and waterfowl; woodland; rough grass; scrub/hedge; ruderals; other  
150 terrestrial habitat (i.e. good quality terrestrial habitat that did not conform to  
151 aforementioned habitat types); and overall terrestrial habitat quality.

152

## 153 **2.2 DNA reference database construction**

154

155 A custom, phylogenetically curated reference database of mitochondrial 12S ribosomal RNA  
156 (rRNA) sequences for UK fish species was previously constructed for eDNA metabarcoding  
157 of lake fish communities (Hänfling et al., 2016). Harper et al. (2018) constructed additional  
158 reference databases for UK amphibians, reptiles, birds, and mammals (Supporting  
159 Information: Appendix 1). Reference sequences available for species varied across  
160 vertebrate groups: amphibians 100.00% ( $N = 21$ ), reptiles 90.00% ( $N = 20$ ), mammals 83.93%  
161 ( $N = 112$ ), and birds 55.88% ( $N = 621$ ). Table S2 lists species without database  
162 representation, i.e. no records for any species in a genus. Sanger sequences were obtained  
163 from tissue of *T. cristatus*, *L. vulgaris*, Alpine newt (*Ichthyosaura alpestris*), common toad  
164 (*Bufo bufo*), and common frog (*Rana temporaria*) to supplement the amphibian database  
165 (Supporting Information: Appendix 1). The complete reference databases compiled in  
166 GenBank format were deposited in a GitHub repository and permanently archived  
167 (<https://doi.org/10.5281/zenodo.1188710>) by Harper et al. (2018).

168

## 169 **2.3 Primer validation**

170

171 Reference databases were combined for *in silico* validation of published 12S rRNA primers  
172 12S-V5-F (5'-ACTGGGATTAGATACCCC-3') and 12S-V5-R (5'-TAGAACAGGCTCCTCTAG-3') (Riaz  
173 et al., 2011) using ecoPCR software (Ficetola et al., 2010). Set parameters allowed a 50-250  
174 bp fragment and three mismatches between each primer and reference sequence. Primers  
175 were validated *in vitro* for UK fish by Hänfling et al. (2016) and by Harper et al. (2018) for six  
176 UK amphibian species (Fig. S2).

177

## 178 **2.4 eDNA metabarcoding**

179

180 We used the taxonomically assigned sequence reads generated with vertebrate eDNA  
181 metabarcoding by Harper et al. (2018). The eDNA metabarcoding workflow is fully described  
182 in Harper et al. (2018) and Supporting Information: Appendix 1. eDNA was first amplified  
183 with the aforementioned primers, where PCR positive controls (six per PCR plate;  $n = 114$ )  
184 were cichlid (*Rhamphochromis esox*) DNA (0.284 ng/ $\mu$ L) and PCR negative controls (six per  
185 PCR plate;  $n = 114$ ) were sterile molecular grade water (Fisher Scientific UK Ltd, UK). PCR  
186 products were individually purified using E.Z.N.A<sup>®</sup> Cycle Pure V-Spin Clean-Up Kits (Omega  
187 Bio-tek, GA, USA) following the manufacturer's protocol. The second PCR bound Multiplex  
188 Identification tags to the purified products. PCR products were individually purified using  
189 magnetic bead clean-up and quantified with a Quant-IT<sup>™</sup> PicoGreen<sup>™</sup> dsDNA Assay  
190 (Invitrogen, UK). Samples were normalised, pooled, and libraries quantified using a Qubit<sup>™</sup>  
191 dsDNA HS Assay (Invitrogen, UK). Libraries were sequenced on an Illumina<sup>®</sup> MiSeq using 2 x  
192 300 bp V3 chemistry (Illumina, Inc, CA, USA) and raw sequence reads processed using



193 metaBEAT (metaBarcoding and Environmental Analysis Tool) v0.97.7  
194 (<https://github.com/HullUni-bioinformatics/metaBEAT>). After quality filtering, trimming,  
195 merging, chimera detection, and clustering, non-redundant query sequences were  
196 compared against our reference database using BLAST (Zhang et al., 2000). Putative  
197 taxonomic identity was assigned using a lowest common ancestor (LCA) approach based on  
198 the top 10% BLAST matches for any query matching with at least 98% identity to a reference  
199 sequence across more than 80% of its length. Unassigned sequences were subjected to a  
200 separate BLAST against the complete NCBI nucleotide (nt) database at 98% identity to  
201 determine the source via LCA as described above. The bioinformatic analysis was archived  
202 (<https://doi.org/10.5281/zenodo.1188710>) by Harper et al. (2018) for reproducibility.

203

## 204 **2.5 Data analysis**

205

206 Analyses were performed in R v.3.4.3 (R Core Team, 2017). Data and R scripts have been  
207 deposited in a dedicated GitHub repository for this study, which has been permanently  
208 archived at: <https://doi.org/10.5281/zenodo.2634427>. Assignments from different  
209 databases were merged, and spurious assignments (i.e. non-UK species, invertebrates and  
210 bacteria) removed from the dataset. The family Cichlidae was reassigned to  
211 *Rhamphochromis esox*. The green-winged teal (*Anas carolinensis*) was reassigned to *Anas*  
212 (Dabbling ducks) because this species is a rare migrant and available reference sequences  
213 were identical across our metabarcode to those for mallard (*Anas platyrhynchos*) and  
214 Eurasian teal (*Anas crecca*), which are widely distributed across the UK. Scottish wildcat  
215 (*Felis silvestris*) does not occur at the sampling localities (Kent, Lincolnshire and Cheshire)  
216 and was therefore reassigned to domestic cat (*Felis catus*). Wild boar (*Sus scrofa*) and grey

217 wolf (*Canis lupus*) were reassigned to domestic pig (*Sus scrofa domesticus*) and domestic  
218 dog (*Canis lupus familiaris*) given the restricted distribution of *S. scrofa* and absence of *C.*  
219 *lupus* in the UK. The genus *Strix* was reassigned to tawny owl (*Strix aluco*) as it is the only UK  
220 representative of this genus. Where family and genera assignments containing a single UK  
221 representative had reads assigned to species, reads from all assignment levels were merged  
222 and manually assigned to that species.

223         Of the 114 PCR negative controls included, 50 produced no reads (Fig. S3). Reads  
224 generated for 64 of 114 PCR negative controls ranged from 0 to 49227, and strength of each  
225 contaminant varied (mean = 0.021%, range = 0 - 100.0% of the total reads per PCR negative  
226 control). To minimise risk of false positives, we evaluated different sequence thresholds.  
227 These included the maximum sequence frequency of *R. esox* DNA in eDNA samples (100%),  
228 maximum sequence frequency of any DNA except *R. esox* in PCR positive controls (83.96%),  
229 and taxon-specific thresholds (maximum sequence frequency of each taxon in PCR positive  
230 controls). The different thresholds were applied to the eDNA samples and the results from  
231 each compared (Fig. S4). The taxon-specific thresholds (Table S3) retained the most  
232 biological information, thus these were selected for downstream analysis. Consequently,  
233 taxa were only classed as present at sites if their sequence frequency exceeded their  
234 threshold. After applying the taxon-specific thresholds, our PCR positive control (*R. esox*),  
235 human (*Homo sapiens*), and domestic species (Table S4) were removed from the dataset.  
236 Higher taxonomic assignments excluding the genus *Anas* were then removed, thus  
237 taxonomic assignments in the final dataset were predominantly of species resolution.

238         The read count data were converted to a species presence-absence matrix.  
239 Hypotheses tested relating to biotic and abiotic determinants of *T. cristatus* occupancy as  
240 well as the umbrella status of *T. cristatus* are summarised in Table 1. We employed

241 Generalized Linear Mixed-effects Models (GLMMs) using the package lme4 v1.1-12 (Bates et  
242 al., 2015) for hypothesis testing. First, we investigated the influence of vertebrate group  
243 species richness on *T. cristatus* occupancy using a binomial GLMM with the logit link  
244 function that included species richness of other amphibians, fish, waterfowl, terrestrial  
245 birds, and mammals as fixed effects and pond as a random effect ( $N = 532$ ). We performed a  
246 preliminary analysis using the package cooccur v1.3 (Griffith, Veech & Marsh, 2016) to  
247 identify species associations between *T. cristatus* and other vertebrates ( $N = 532$ ). Identified  
248 associations in conjunction with the existing *T. cristatus* literature informed candidate biotic  
249 variables to be modelled against *T. cristatus* occupancy ( $n = 504$ ). The existing *T. cristatus*  
250 literature informed candidate abiotic variables to be modelled against *T. cristatus*  
251 occupancy ( $n = 504$ ).

252 Selection of a suitable set of explanatory variables and modelling framework is fully  
253 described in Supporting Information: Appendix 1. Briefly, candidate biotic and abiotic  
254 explanatory variables were assessed for collinearity, relative importance, and non-linearity.  
255 We constructed separate binomial GLMMs with the logit link function for biotic and abiotic  
256 explanatory variables that included sample as a random effect. We modelled HSI score  
257 (fixed effect) and sample (random effect) separately to prevent HSI score masking variation  
258 caused by the individual biotic and abiotic variables it encompasses. Using a Poisson GLMM  
259 with sample as a random effect, we tested the umbrella species status of *T. cristatus* by  
260 modelling vertebrate species richness against *T. cristatus* presence-absence and the *T.*  
261 *cristatus* HSI score.

262 For each GLMM, we employed an information-theoretic approach using Akaike  
263 Information Criterion (AIC) to determine the most parsimonious approximating model to  
264 make predictions (Akaike, 1973). Biotic and abiotic models considered respectively were

265 nested thus the best models were chosen using stepwise backward deletion of terms based  
266 on Likelihood Ratio Tests (LRTs). The HSI score and vertebrate species richness models were  
267 compared to null GLMMs. Final models were tested for overdispersion using a custom  
268 function testing overdispersion of the Pearson residuals. Model fit was assessed using the  
269 Hosmer and Lemeshow Goodness of Fit Test within the package ResourceSelection v0.2-4  
270 (Lele, Keim & Solymos, 2016), quantile-quantile plots, and partial residual plots (Zuur et al.,  
271 2009). Model predictions were obtained using the predictSE function in the package  
272 AICcmodavg v2.0-3 (Mazerolle, 2016) and upper and lower 95% CIs were calculated from  
273 the standard error of the predictions. Results were plotted using the package ggplot2 v2.1.0  
274 (Wickham, 2016).

275

276

### 277 **3. Results**

278

#### 279 **3.1 eDNA metabarcoding**

280

281 A total of 532 eDNA samples and 228 PCR controls were processed across two sequencing  
282 runs. The runs generated raw sequence read counts of 36,236,862 and 32,900,914  
283 respectively. After quality filtering, trimming, and merging of paired-end reads, 26,294,906  
284 and 26,451,564 sequences remained. Following removal of chimeras and redundancy via  
285 clustering, the libraries contained 14,141,237 and 14,081,939 sequences (average read  
286 counts of 36,826 and 36,671 per sample respectively), of which 13,126,148 and 13,113,143  
287 sequences were taxonomically assigned. The final dataset (assignments corrected,  
288 thresholds applied, and assignments removed) contained 53 vertebrate species (Table S5),

289 including six amphibians, 14 fish, 17 birds, and 16 mammals (Fig. 1).

290

### 291 **3.2 Pondscape biodiversity**

292

293 All native amphibians were found as well as the non-native marsh frog (*Pelophylax*  
294 *ridibundus*). *T. cristatus* ( $n = 148$ ), *L. vulgaris* ( $n = 151$ ) and *R. temporaria* ( $n = 122$ ) were  
295 widespread, but *B. bufo* ( $n = 42$ ), palmate newt (*Lissotriton helveticus* [ $n = 5$ ]) and *P.*  
296 *ridibundus* were uncommon ( $n = 1$ ). The threatened European eel (*Anguilla anguilla* [ $n =$   
297  $15$ ]), European bullhead (*Cottus gobio* [ $n = 14$ ]), and *C. carassius* ( $n = 2$ ) were detected  
298 alongside native fishes, such as pike (*Esox Lucius* [ $n = 17$ ]) and roach (*Rutilus rutilus* [ $n = 71$ ]),  
299 but also introduced species, including *C. carpio* ( $n = 40$ ), ruffe (*Gymnocephalus cernua* [ $n =$   
300  $1$ ]), and rainbow trout (*Oncorhynchus mykiss* [ $n = 3$ ]). Some identified waterfowl were  
301 ubiquitous, such as common moorhen (*Gallinula chloropus* [ $n = 211$ ]), whereas others were  
302 less common, e.g. grey heron (*Ardea cinerea* [ $n = 1$ ]) and Eurasian oystercatcher  
303 (*Haematopus ostralegus* [ $n = 1$ ]). Terrestrial fauna were often detected in fewer than five  
304 ponds (Figs. 1c, d). Buzzard (*Buteo buteo* [ $n = 4$ ]), Eurasian jay (*Garrulus glandarius* [ $n = 7$ ]),  
305 dunnock (*Prunella modularis* [ $n = 4$ ]), and starling (*Sturnus vulgaris* [ $n = 4$ ]) were the most  
306 frequently detected terrestrial birds. Introduced mammals (Mathews et al., 2018), such as  
307 grey squirrel (*Sciurus carolinensis* [ $n = 57$ ]) and Reeve's muntjac (*Muntiacus reevesi* [ $n = 3$ ]),  
308 outweighed native mammals. Nonetheless, we detected several mammals with Biodiversity  
309 Actions Plans and/or of conservation concern (Mathews et al., 2018), including otter (*Lutra*  
310 *lutra* [ $n = 1$ ]), water vole (*Arvicola amphibious* [ $n = 16$ ]), European polecat (*Mustela putorius*  
311 [ $n = 1$ ]), brown hare (*Lepus europaeus* [ $n = 1$ ]) and water shrew (*Neomys fodiens* [ $n = 8$ ]).  
312 Notably, the invasive American mink (*Neovison vison*) was absent despite widespread UK

313 distribution (Mathews et al., 2018). All species and their detection frequencies are listed in  
314 Table S5.

315

### 316 **3.3 Biotic determinants of *T. cristatus* occupancy**

317

318 *T. cristatus* occupancy was positively influenced by amphibian and waterfowl species  
319 richness, yet negatively influenced by mammal species richness. *T. cristatus* occupancy was  
320 reduced as fish and terrestrial bird species richness increased, but these trends were not  
321 significant (Fig. 2; GLMM: overdispersion  $\theta = 0.994$ ,  $\chi^2_{525} = 521.778$ ,  $P = 0.532$ ; fit  $\chi^2_8 =$   
322  $48.537$ ,  $P < 0.001$ ,  $R^2 = 10.91\%$ ). *T. cristatus* had significant ( $P < 0.05$ ) positive associations  
323 with three species (Fig. S5), including *L. vulgaris*, common coot (*Fulica atra*), and *G.*  
324 *chloropus*. However, *T. cristatus* had significant ( $P < 0.05$ ) negative associations with six  
325 species (Fig. S5), including *B. bufo*, *C. carpio*, *G. aculeatus*, *P. pungitius*, common pheasant  
326 (*Phasianus colchicus*), and *S. carolinensis*. Only presence-absence of *L. vulgaris*, *B. bufo*, *C.*  
327 *carpio*, *G. aculeatus*, and *G. chloropus* were retained by model selection as explanatory  
328 variables for the biotic GLMM of *T. cristatus* occupancy (Figs. 3a-e; GLMM: overdispersion  $\theta$   
329  $= 1.001$ ,  $\chi^2_{495} = 495.297$ ,  $P = 0.488$ ; fit  $\chi^2_8 = 101.820$ ,  $P < 0.001$ ,  $R^2 = 27.80\%$ ). Waterfowl  
330 presence-absence was also retained in the biotic GLMM (Fig. 3f). Results of analyses are  
331 summarised and compared to previously reported determinants in Table 1.

332 *T. cristatus* individuals were more likely to occupy ponds with more amphibian  
333 species (Fig. 2a). *T. cristatus* was detected in 51.66% of ponds ( $n = 151$ ) containing *L.*  
334 *vulgaris*, but in only 11.91% of ponds ( $n = 42$ ) with *B. bufo* (Fig. 1a). Probability of *T. cristatus*  
335 occupancy was lower in ponds with more fish species, and *T. cristatus* was absent from  
336 ponds with more than four fish species (Fig. 2b). *T. cristatus* was only found in 15.00% ( $n =$

337 40), 14.55% ( $n = 55$ ) and 6.67% ( $n = 15$ ) of ponds inhabited by *C. carpio*, *G. aculeatus* and *P.*  
338 *pungitius* respectively (Fig. 1b). In contrast, *T. cristatus* individuals were more likely to occur  
339 in ponds with more waterfowl species (Fig. 2c). *T. cristatus* occupied 41.67% ( $n = 48$ ) and  
340 36.02% ( $n = 211$ ) of ponds with *F. atra* and *G. chloropus* respectively (Fig. 1c). *T. cristatus*  
341 occupancy was negatively influenced by higher terrestrial bird species richness, but not  
342 significantly so (Fig. 2d). However, *T. cristatus* was negatively associated with *P. colchicus*,  
343 being found in only 12.00% ( $n = 25$ ) ponds with *P. colchicus* records (Fig. 1c). *T. cristatus*  
344 were less likely to occupy ponds with more mammal species (Figs. 2e). Specifically, *T.*  
345 *cristatus* was negatively associated with *S. carolinensis* and found in only 15.79% ( $n = 57$ ) of  
346 ponds with *S. carolinensis* records (Fig. 1d).

347

#### 348 **3.4 Abiotic determinants of *T. cristatus* occupancy**

349

350 Three explanatory variables were retained in the abiotic GLMM explaining *T. cristatus*  
351 occupancy (GLMM: overdispersion  $\theta = 1.004$ ,  $\chi^2_{499} = 500.995$ ,  $P = 0.467$ ; fit  $\chi^2_8 = 14.409$ ,  $P =$   
352  $0.072$ ,  $R^2 = 9.73\%$ ). The probability of *T. cristatus* occupancy decreased in ponds with inflow  
353 present, larger area, and higher percentage of shading (Table 1, Figs. 3g-i).

354

#### 355 **3.5 *T. cristatus* HSI and umbrella status**

356

357 HSI score positively correlated with *T. cristatus* occupancy (GLMM: overdispersion  $\theta = 1.012$ ,  
358  $\chi^2_{501} = 506.893$ ,  $P = 0.418$ ; fit  $\chi^2_8 = 7.270$ ,  $P = 0.508$ ,  $R^2 = 5.45\%$ ), where *T. cristatus*  
359 individuals were more likely to occupy ponds with a higher HSI score (Table 1, Fig. 3j).  
360 Vertebrate species richness was positively associated with *T. cristatus* occupancy (GLMM:

361 overdispersion  $\theta = 0.977$ ,  $\chi^2_{500} = 488.687$ ,  $P = 0.633$ ; fit  $\chi^2_8 = -158.03$ ,  $P = 1.000$ ,  $R^2 =$   
362 13.63%), with more species detected in ponds occupied by *T. cristatus* (Fig. 4a;  $\chi^2_1 = 40.985$ ,  
363  $P < 0.001$ ). However, vertebrate species richness did not significantly increase with the *T.*  
364 *cristatus* HSI score (Fig. 4b;  $\chi^2_1 = 1.207$ ,  $P = 0.272$ ).

365

366

#### 367 **4. Discussion**

368

369 We have validated eDNA metabarcoding for ecological hypothesis testing using the  
370 community data generated by this tool in combination with environmental metadata for  
371 ponds. We tested biotic and abiotic determinants of *T. cristatus* occupancy, whether the HSI  
372 can be applied to *T. cristatus* eDNA survey, and whether *T. cristatus* is truly an umbrella  
373 species for pond conservation. *T. cristatus* occupancy was higher in ponds containing *L.*  
374 *vulgaris* and *G. chloropus*, and ponds without *B. bufo*, *C. carpio*, and *G. aculeatus*. *T.*  
375 *cristatus* individuals were also more likely to occupy ponds where waterfowl occurred.  
376 Ponds inhabited by *T. cristatus* were typically small, absent of inflow, and not excessively  
377 shaded. The *T. cristatus* HSI was appropriate for predicting *T. cristatus* occupancy, but not  
378 vertebrate species richness. Nonetheless, more vertebrates were present in ponds occupied  
379 by *T. cristatus* thus presence of this amphibian may indicate good quality habitat for other  
380 vertebrates. Our findings demonstrate the power of eDNA metabarcoding to enhance  
381 freshwater monitoring and research by providing biodiversity data *en masse* at low cost.

382



#### 383 **4.1 Pondscape biodiversity**

384

385 eDNA metabarcoding detected six amphibian, 14 fish, 17 bird, and 16 mammal species  
386 across 532 UK ponds. This diverse species inventory emphasises the importance of ponds as  
387 habitat for aquatic taxa, but also as stepping stones for semi-aquatic and terrestrial taxa (De  
388 Meester et al., 2005; Hill et al., 2018) through provision of drinking, foraging, dispersive, and  
389 reproductive opportunities (Biggs et al., 2016; Klymus et al., 2017). Some species detections  
390 may be the result of eDNA transport from water bodies in the surrounding area (Hänfling et  
391 al., 2016) to ponds via inflow. However, this signifies the capacity of ponds to provide  
392 natural samples of freshwater and terrestrial biodiversity in the wider catchment (Deiner et  
393 al., 2017).

394

#### 395 **4.2 Biotic determinants of *T. cristatus* occupancy**

396

397 *T. cristatus* were more likely to occupy ponds with higher amphibian species richness -  
398 particularly ponds containing *L. vulgaris* and absent of *B. bufo*. *T. cristatus* and *L. vulgaris*  
399 have similar habitat requirements and tend to breed in the same ponds (Skei et al., 2006;  
400 Rannap et al., 2009a; Denoël et al., 2013; Cayuela et al., 2018), with >60% overlap reported  
401 (Rannap & Briggs, 2006). However, *L. vulgaris* can inhabit a broader range of habitat  
402 (Rannap & Briggs, 2006; Skei et al., 2006) than *T. cristatus*, which depends on larger, deeper  
403 ponds with abundant macrophytes and no fish located in open, semi-rural landscapes  
404 (Denoël et al., 2013). *B. bufo* can inhabit fish-containing ponds (Manenti & Pennati, 2016)  
405 and *T. cristatus* may predate *B. bufo* eggs and larvae (Langton et al., 2001). This may explain  
406 the negative association between *B. bufo* and *T. cristatus* as opposed to the positively

407 associated *T. cristatus* and *L. vulgaris*.

408 *T. cristatus* occupancy marginally decreased with higher fish species richness, and *T.*  
409 *cristatus* was negatively associated with *C. carpio*, *G. aculeatus*, and *P. pungitius*. These  
410 fishes are common in and typical of ponds. All *T. cristatus* life stages may be predated by  
411 fishes (Langton et al., 2001) and negative effects of fish presence-absence on *T. cristatus*  
412 occupancy, distribution, and abundance are repeatedly reported (Joly et al., 2001; Rannap &  
413 Briggs, 2006; Skei et al., 2006; Denoël & Ficetola, 2008; Rannap et al., 2009a, b; Hartel et al.,  
414 2010; Denoël et al., 2013). *G. aculeatus* predated *T. cristatus* eggs and larvae (McLee &  
415 Scaife, 1992; Jarvis, 2010), and has non-consumptive effects on *T. cristatus* embryos (Jarvis,  
416 2010). *T. cristatus* larvae were also found to alter their behaviour when exposed to  
417 predatory *G. aculeatus* but not non-predatory *C. carassius* (Jarvis, 2012), another fish  
418 characteristic of ponds.

419 In our study, we detected *T. cristatus* in 50% of ponds inhabited by *C. carassius*, but  
420 <20% of ponds containing large and/or predatory fishes, e.g. *C. carpio*, *G. aculeatus*, *E.*  
421 *lucius*. Although fewer ponds contained *C. carassius* than *C. carpio*, *G. aculeatus* or *E. lucius*,  
422 previous research also indicates large and/or predatory fish are more detrimental to *T.*  
423 *cristatus* occurrence (Skei et al., 2006; Hartel et al., 2010; Chan, 2011). *C. carassius* does not  
424 hinder *T. cristatus* oviposition, larval behaviour, or recruitment success (Chan, 2011; Jarvis,  
425 2012), or pond invertebrate and macrophyte diversity (Stefanoudis et al., 2017). In contrast,  
426 *C. carpio* foraging reduces invertebrate density and macrophyte cover (Maceda-Veiga, López  
427 & Green, 2017), which lowers *T. cristatus* reproductive and foraging success and heightens  
428 predator exposure (Rannap & Briggs, 2006; Gustafson et al., 2006; Chan, 2011). *C. carassius*  
429 and *C. carpio* are both included among fish species assumed to negatively impact *T. cristatus*  
430 and whose presence-absence is assessed for the *T. cristatus* HSI (ARG-UK, 2010). However, it

431 is evident that *C. carassius* does not directly predate *T. cristatus* or indirectly alter its  
432 behaviour, reproductive success, or habitat. Therefore, we advocate a systematic re-  
433 evaluation of problematic fish species for *T. cristatus* conservation.

434 *T. cristatus* was positively associated with waterfowl species richness, namely  
435 presence of *F. atra* and *G. chloropus*. These waterfowl species share macrophytes and  
436 macroinvertebrates as resources with amphibians, feeding on both directly (Perrow et al.,  
437 1997; Paillisson & Marion, 2001; Wallau et al., 2010). *F. atra* and *G. chloropus* crop  
438 emergent macrophytes to search for invertebrate prey (Paillisson & Marion, 2001; Wallau et  
439 al., 2010), which may indirectly benefit *T. cristatus* foraging. Although *Fulica* spp. can also  
440 pull up submerged vegetation and damage vegetation banks (Lauridsen, Jeppesen &  
441 Andersen, 1993), diet is macrophyte-dominated in late summer and autumn (Perrow et al.,  
442 1997) and unlikely to impact *T. cristatus* breeding in spring (Langton et al., 2001). The  
443 positive association identified here between *T. cristatus* and these waterfowl most likely  
444 reflects a shared preference for macrophyte-rich ponds.

445 *T. cristatus* were less likely to occupy ponds with higher mammal species richness.  
446 Our preliminary cooccur analysis indicated *T. cristatus* had negative associations with *P.*  
447 *colchicus* and *S. carolinensis*. The terrestrial associations identified are most likely indirect  
448 and a reflection of land-use rather than direct as a result of predation or competition, but  
449 further investigation would be worthwhile.

450

#### 451 **4.3 Abiotic determinants of *T. cristatus* occupancy**

452

453 *T. cristatus* was less likely to inhabit large ponds with inflow present and a greater  
454 percentage of shading. Although our results indicate *T. cristatus* prefers smaller ponds, pond

455 area does not always influence occupancy (Maletzky, Kyek & Goldschmid, 2007; Denoël &  
456 Ficetola, 2008; Gustafson et al., 2011) and was deemed a poor predictor of reproductive  
457 success (Vuorio et al., 2013). *T. cristatus* has been found to utilise small and large ponds  
458 (Rannap & Briggs, 2006; Skei et al., 2006); however, very small ponds (<124 m<sup>2</sup>) may be  
459 unable to support all life stages, and larger ponds may contain fish and experience  
460 eutrophication due to agricultural or polluted run-off (Rannap & Briggs, 2006). Inflow to  
461 ponds may exacerbate these problems by facilitating entry of agricultural or polluted run-off  
462 and connections to streams and rivers containing large, predatory fish (Freshwater Habitats  
463 Trust, 2015). Our results corroborate existing research where viable *T. cristatus* populations  
464 were unlikely in ponds that were shaded (Vuorio et al., 2013) or had dense macrophyte  
465 cover (Rannap & Briggs, 2006; Skei et al., 2006; Hartel et al., 2010).

466 In our study, most environmental metadata available were qualitative, preventing  
467 detailed analyses on pond properties and terrestrial habitat in relation to *T. cristatus*  
468 occupancy. Better understanding of *T. cristatus* occupancy in relation to species interactions  
469 and habitat quality could be achieved with quantitative data on pond properties (e.g. water  
470 chemistry), terrestrial habitat (e.g. type, density, distance to ponds), and aquatic and  
471 terrestrial habitat usage by different vertebrate species. Furthermore, given the  
472 metapopulation dynamics of *T. cristatus*, future research should investigate spatial drivers  
473 (e.g. land cover, pond density, climate variables, roads, rivers, elevation) of *T. cristatus*  
474 occupancy using innovative modelling approaches, such as individual-based models  
475 (Messenger & Olden, 2018). However, acquiring this data to perform these models is a  
476 phenomenal task for large numbers of ponds across a vast landscape (Denoël & Ficetola,  
477 2008).

478

#### 479 **4.4 *T. cristatus* HSI and umbrella status**

480

481 We found the HSI can predict eDNA-based *T. cristatus* occupancy at the UK pondscape. This  
482 contradicts conventional studies which deemed the index inappropriate for predicting *T.*  
483 *cristatus* occupancy or survival probabilities (Unglaub et al., 2015). We detected more  
484 vertebrates in ponds containing *T. cristatus*, which may support its status as an umbrella  
485 species for pond biodiversity and conservation (Gustafson et al., 2006). We also observed a  
486 non-significant increase in vertebrate species richness with increasing *T. cristatus* HSI score.  
487 An adapted HSI, designed to predict species richness, could help select areas for  
488 management and enhancement of aquatic and terrestrial biodiversity. Until then, presence  
489 of *T. cristatus* and its HSI may confer protection to broader biodiversity by identifying  
490 optimal habitat for pond creation and restoration to encourage populations of this  
491 threatened amphibian. The HSI is not without issue due to qualitative data used for score  
492 calculation and subjective estimation of indices (Oldham et al., 2000). For future application  
493 of this index in *T. cristatus* eDNA survey, we recommend metabarcoding to quantify some  
494 qualitatively assessed indices (e.g. water quality via macroinvertebrate diversity, fish and  
495 waterfowl presence) alongside *T. cristatus* detection. Provided rigorous spatial and temporal  
496 sampling are undertaken, eDNA metabarcoding can also generate site occupancy data to  
497 estimate relative species abundance (Valentini et al., 2016; Hänfling et al., 2016).

498

#### 499 **4.5 Prospects of eDNA metabarcoding for freshwater conservation, management, and** 500 **research**

501

502 We have demonstrated the effectiveness of eDNA metabarcoding for landscape-scale

503 biodiversity monitoring and ecological hypothesis testing. We combined metabarcoding  
504 with environmental metadata to revisit hypotheses relating to biotic and abiotic  
505 determinants of a threatened amphibian at the UK pondscape. Our findings will guide *T.*  
506 *cristatus* conservation in the face of increasing land-use and habitat fragmentation - a  
507 poignant issue as protective legislation for this species in the UK is changing. Whilst  
508 conservation of threatened species and their habitat should be a priority, the bigger picture  
509 should not be ignored. eDNA metabarcoding could enhance our understanding of  
510 freshwater networks, particularly pondscales, to enable more effective monitoring,  
511 protection, and management of aquatic and terrestrial biodiversity. We are only now  
512 beginning to realise and explore these opportunities.

513

514

## 515 **Acknowledgements**

516

517 This work was funded by the University of Hull. We would like to thank Jennifer Hodgetts  
518 (Fera Science Ltd) for assisting with sample collection, and Jianlong Li (University of Hull) for  
519 primer design and advice on laboratory protocols. Tissue samples for primer validation and  
520 Sanger sequencing were provided by Andrew Buxton and Richard Griffiths (DICE, University  
521 of Kent) under licence from Natural England, and Barbara Mabel and Elizabeth Kilbride  
522 (University of Glasgow).

523

524

## 525 **Data Availability**

526

527 The taxonomically assigned sequence reads used in this study were generated by Harper et  
528 al. (2018). The raw sequence reads were archived on the NCBI Sequence Read Archive  
529 (Bioproject: PRJNA417951; SRA accessions: SRR6285413 - SRR6285678). The bioinformatics  
530 analysis was deposited in a GitHub repository and permanently archived  
531 (<https://doi.org/10.5281/zenodo.1188710>). R scripts and corresponding data for this study  
532 have been deposited in a separate GitHub repository which has been permanently archived  
533 (<https://doi.org/10.5281/zenodo.2634427>).

534

535

## 536 **Author Contributions**

537

538 B.H, L.R.H, L.L.H and N.B conceived and designed the study. H.C.R and N.B contributed  
539 samples for processing. L.R.H performed laboratory work and analysed the data. I.P.A and  
540 E.L offered advice on and supervised sequencing. C.H assisted with bioinformatics analysis.  
541 P.B and S.P contributed datasets for analysis. L.R.H wrote the manuscript, which all authors  
542 revised.

543

544

## 545 References

546

547 Akaike, H. (1973). Maximum likelihood identification of Gaussian autoregressive moving  
548 average models. *Biometrika*, **60**, 255–265. <https://doi.org/10.2307/2334537>

549 ARG-UK. (2010). *ARG UK Advice Note 5: Great Crested Newt Habitat Suitability Index*.  
550 Amphibian and Reptile Groups of the United Kingdom.

551 Bálint, M., Nowak, C., Márton, O., Pauls, S. U., Wittwer, C., Aramayo, J. L., Schulze, A.,  
552 Chambert, T., Cocchiararo, B., & Jansen, M. (2018). Accuracy, limitations and cost  
553 efficiency of eDNA-based community survey in tropical frogs. *Molecular Ecology*  
554 *Resources*, **18**, 1415–1426. <https://doi.org/10.1111/1755-0998.12934>

555 Barnes, M. A., & Turner, C. R. (2015). The ecology of environmental DNA and implications  
556 for conservation genetics. *Conservation Genetics*, **17**, 1–17.  
557 <https://doi.org/10.1007/s10592-015-775-4>

558 Bates, D., Mächler, M., Bolker, B., & Walker, S. (2015). Fitting Linear Mixed-Effects Models  
559 Using lme4. *Journal of Statistical Software*, **67**, 1–48.  
560 <https://doi.org/10.18637/jss.v067.i01>

561 Biggs, J., Ewald, N., Valentini, A., Gaboriaud, C., Dejean, T., Griffiths, R. A., Foster, J.,  
562 Wilkinson, J. W., Arnell, A., Brotherton, P., Williams, P., & Dunn, F. (2015). Using eDNA to  
563 develop a national citizen science-based monitoring programme for the great crested  
564 newt (*Triturus cristatus*). *Biological Conservation*, **183**, 19–28.  
565 <https://doi.org/10.1016/j.biocon.2014.11.029>

566 Biggs, J., von Fumetti, S., & Kelly-Quinn, M. (2016). The importance of small waterbodies for  
567 biodiversity and ecosystem services: implications for policy makers. *Hydrobiologia*, **793**,  
568 3–39. <https://doi.org/10.1007/s10750-016-3007-0>

569 Cayuela, H., Grolet, O., & Joly, P. (2018). Context-dependent dispersal, public information,  
570 and heterospecific attraction in newts. *Oecologia*, **188**, 1069–1080.

571 Chan, K. (2011). Can great crested newts (*Triturus cristatus*) coexist with fish?. Masters  
572 Thesis. University College London (UCL).

573 Deiner, K., Bik, H. M., Mächler, E., Seymour, M., Lacoursière-Roussel, A., Altermatt, F., Creer,  
574 S., Bista, I., Lodge, D. M., de Vere, N., Pfrender, M. E., & Bernatchez, L. (2017).  
575 Environmental DNA metabarcoding: transforming how we survey animal and plant  
576 communities. *Molecular Ecology*, **26**, 5872–5895. <https://doi.org/10.1111/mec.14350>

577 De Meester, L., Declerck, S., Stoks, R., Louette, G., Van De Meutter, F., De Bie, T., Michels, E.,  
578 & Brendonck, L. (2005). Ponds and pools as model systems in conservation biology,  
579 ecology and evolutionary biology. *Aquatic Conservation: Marine and Freshwater*  
580 *Ecosystems*, **15**, 715–725. <https://doi.org/10.1002/aqc.748>

581 Denoël, M., & Ficetola, G. F. (2008). Conservation of newt guilds in an agricultural landscape  
582 of Belgium: the importance of aquatic and terrestrial habitats. *Aquatic Conservation:*  
583 *Marine and Freshwater Ecosystems*, **18**, 714–728. <https://doi.org/10.1002/aqc.853>

584 Denoël, M., Perez, A., Cornet, Y., & Ficetola, G. F. (2013). Similar local and landscape  
585 processes affect both a common and a rare newt species. *PLoS ONE*, **8**, e62727.  
586 <https://doi.org/10.1371/journal.pone.0062727>

587 Edgar, P., & Bird, D. R. (2006). *Action Plan for the Conservation of the Crested Newt Triturus*  
588 *Cristatus Species Complex in Europe*. Council of the European Union, Strassbourg,  
589 Germany.



- 590 Evans, N. T., Li, Y., Renshaw, M. A., Olds, B. P., Deiner, K., Turner, C. R., Jerde, C. L., Lodge, D.  
591 M., Lamberti, G. A., & Pfrender, M. E. (2017). Fish community assessment with eDNA  
592 metabarcoding: effects of sampling design and bioinformatic filtering. *Canadian Journal*  
593 *of Fisheries and Aquatic Sciences*, **74**, 1362-1374. [https://doi.org/10.1139/cjfas-2016-](https://doi.org/10.1139/cjfas-2016-0306)  
594 [0306](https://doi.org/10.1139/cjfas-2016-0306)
- 595 Ficetola, G. F., Coissac, E., Zundel, S., Riaz, T., Shehzad, W., Bessi re, J., Taberlet, P., &  
596 Pompanon, F. (2010). An *In silico* approach for the evaluation of DNA barcodes. *BMC*  
597 *Genomics*, **11**, 434. <https://doi.org/10.1186/1471-2164-11-434>
- 598 Freshwater Habitats Trust (2015). Pond Habitat Survey Method Booklet. Freshwater  
599 Habitats Trust, Oxford.
- 600 Griffith, D., Veech, J., & Marsh, C. (2016). cooccur: Probabilistic Species Co-Occurrence  
601 Analysis in R. *Journal of Statistical Software*, **69**, 1–17.  
602 <https://doi.org/10.18637/jss.v069.c02>
- 603 Gustafson, D. H., Pettersson, C. J., & Malmgren, J. C. (2006). Great crested newts (*Triturus*  
604 *crystatus*) as indicators of aquatic plant diversity. *The Herpetological Journal*, **16**, 347–  
605 352.
- 606 Gustafson, D. H., Malmgren, J. C., & Mikusiński, G. (2011). Terrestrial Habitat Predicts use of  
607 Aquatic Habitat for Breeding Purposes — A Study on the Great Crested Newt (*Triturus*  
608 *crystatus*). *Annales Zoologici Fennici*, **48**, 295–307. <https://doi.org/10.5735/086.048.0504>
- 609 H nfling, B., Lawson Handley, L., Read, D. S., Hahn, C., Li, J., Nichols, P., Blackman, R. C.,  
610 Oliver, A., & Winfield, I. J. (2016). Environmental DNA metabarcoding of lake fish  
611 communities reflects long-term data from established survey methods. *Molecular*  
612 *Ecology*, **25**, 3101–3119. <https://doi.org/10.1111/mec.13660>
- 613 Harper, L. R., Lawson Handley, L., Hahn, C., Boonham, N., Rees, H. C., Gough, K. C., Lewis, E.,  
614 Adams, I. P., Brotherton, P., Phillips, S., & H nfling, B. (2018). Needle in a haystack? A  
615 comparison of eDNA metabarcoding and targeted qPCR for detection of the great crested  
616 newt (*Triturus cristatus*). *Ecology and Evolution*, **8**, 6330–6341.  
617 <https://doi.org/10.1002/ece3.4013>
- 618 Harper, L. R., Buxton, A. S., Rees, H. C., Bruce, K., Brys, R., Halfmaerten, D., Read, D. S.,  
619 Watson, H. V., Sayer, C. D., Jones, E. P., Priestley, V., M chler, E., M rria, C., Garc s-  
620 Pastor, S., Medupin, C., Burgess, K., Benson, G., Boonham, N., Griffiths, R. A., Lawson  
621 Handley, L., & H nfling, B. (2019). Prospects and challenges of environmental DNA  
622 (eDNA) monitoring in freshwater ponds. *Hydrobiologia*, **826**, 25–41.  
623 <https://doi.org/10.1007/s10750-018-3750-5>
- 624 Hartel, T., Nemes, S., & Oellerer, K. (2010). Using connectivity metrics and niche modelling  
625 to explore the occurrence of the northern crested newt *Triturus cristatus* (Amphibia,  
626 Caudata) in a traditionally managed landscape. *The Environmentalist*, **37**, 195–200.  
627 <https://doi.org/10.1017/S037689291000055X>
- 628 Hering, D., Borja, A., Jones, J. I., Pont, D., Boets, P., Bouchez, A., Bruce, K., Drakare, S.,  
629 H nfling, B., Kahlert, M., Leese, F., Meissner, K., Mergen, P., Reyjol, Y., Segurado, P.,  
630 Vogler, A., & Kelly, M. (2018). Implementation options for DNA-based identification into  
631 ecological status assessment under the European Water Framework Directive. *Water*  
632 *Research*, **138**, 192–205. <https://doi.org/10.1016/j.watres.2018.03.003>
- 633 Hill, M. J., Hassall, C., Oertli, B., Fahrig, L., Robson, B. J., Biggs, J., Samways, M. J., Usio, N.,  
634 Takamura, N., Krishnaswamy, J., & Wood, P. J. (2018). New policy directions for global  
635 pond conservation. *Conservation Letters*, **e12447**. <https://doi.org/10.1111/conl.12447>

- 636 Jarvis, L. E. (2010). Non-consumptive effects of predatory three-spined sticklebacks  
637 (*Gasterosteus aculeatus*) on great crested newt (*Triturus cristatus*) embryos. *The*  
638 *Herpetological Journal*, **20**, 271–275.
- 639 Jarvis, L. E. (2012). Microhabitat preferences of the great crested newt *Triturus cristatus* in a  
640 woodland area. PhD Thesis. Open University.
- 641 Joly, P., Miaud, C., Lehmann, A., & Grolet, O. (2001). Habitat Matrix Effects on Pond  
642 Occupancy in Newts. *Conservation Biology*, **15**, 239–248. <https://doi.org/10.1111/j.1523-1739.2001.99200.x>
- 644 Kelly, R. P., O'Donnell, J. L., Lowell, N. C., Shelton, A. O., Samhouri, J. F., Hennessey, S. M.,  
645 Feist, B. E., & Williams, G. D. (2016). Genetic signatures of ecological diversity along an  
646 urbanization gradient. *PeerJ*, **4**, e2444. <https://doi.org/10.7717/peerj.2444>
- 647 Klymus, K. E., Richter, C. A., Thompson, N., & Hinck, J. E. (2017). Metabarcoding of  
648 Environmental DNA Samples to Explore the Use of Uranium Mine Containment Ponds as  
649 a Water Source for Wildlife. *Diversity*, **9**, 1–18. <https://doi.org/10.3390/d9040054>
- 650 Langton, T., Beckett, C., & Foster, J. (2001). Great crested newt conservation handbook.  
651 Froglife, Halesworth.
- 652 Lauridsen, T. L., Jeppesen, E., & Andersen, F. Ø. (1993). Colonization of submerged  
653 macrophytes in shallow fish manipulated Lake Væng: impact of sediment composition  
654 and waterfowl grazing. *Aquatic Botany*, **46**, 1–15. [https://doi.org/10.1016/0304-3770\(93\)90061-Z](https://doi.org/10.1016/0304-3770(93)90061-Z)
- 656 Lawson Handley, L. (2015). How will the “molecular revolution” contribute to biological  
657 recording? *Biological Journal of the Linnean Society*, **115**, 750–766.  
658 <https://doi.org/10.1111/bij.12516>
- 659 Lele, S. R., Keim, J. L., & Solymos, P. (2016). ResourceSelection: Resource Selection  
660 (Probability) Functions for Use-Availability Data.
- 661 Li, Y., Evans, N. T., Renshaw, M. A., Jerde, C. L., Olds, B. P., Shogren, A. J., Deiner, K., Lodge,  
662 D. M., Lamberti, G. A., & Pfrender, M. E. (2018a). Estimating fish alpha- and beta-diversity  
663 along a small stream with environmental DNA metabarcoding. *Metabarcoding and*  
664 *Metagenomics*, **2**, e24262. <https://doi.org/10.3897/mbmg.2.24262>
- 665 Li, F., Peng, Y., Fang, W., Altermatt, F., Xie, Y., Yang, J., & Zhang, X. (2018b). Application of  
666 environmental DNA metabarcoding for predicting anthropogenic pollution in rivers.  
667 *Environmental Science & Technology*, **52**, 11708–11719.  
668 <https://doi.org/10.1021/acs.est.8b03869>
- 669 Maceda-Veiga, A., López, R., & Green, A. J. (2017). Dramatic impact of alien carp *Cyprinus*  
670 *carpio* on globally threatened diving ducks and other waterbirds in Mediterranean  
671 shallow lakes. *Biological Conservation*, **212**, 74–85.  
672 <https://doi.org/10.1016/j.biocon.2017.06.002>
- 673 Macher, J. -N., Vivancos, A., Piggott, J. J., Centeno, F. C., Matthaei, C. D., & Leese, F. (2018).  
674 Comparison of environmental DNA and bulk-sample metabarcoding using highly  
675 degenerate cytochrome c oxidase I primers. *Molecular Ecology Resources*, **18**, 1456–  
676 1468. <https://doi.org/10.1111/1755-0998.12940>
- 677 Maletzky, A., Kyek, M., & Goldschmid, A. (2007). Monitoring status, habitat features and  
678 amphibian species richness of crested newt (*Triturus cristatus* superspecies) ponds at the  
679 edge of the species range (Salzburg, Austria). *Annales de Limnologie - International*  
680 *Journal of Limnology*, **43**, 107–115. <https://doi.org/10.1051/limn/2007017>

- 681 Manenti, R., & Pennati, R. (2016). Environmental factors associated with amphibian  
682 breeding in streams and springs: effects of habitat and fish occurrence. *Amphibia-*  
683 *Reptilia*, **37**, 237–242. <https://doi.org/10.1163/15685381-00003040>
- 684 Mathews, F., Kubasiewicz, L. M., Gurnell, J., Harrower, C. A., McDonald, R. A., & Shore, R. F.  
685 (2018). A Review of the Population and Conservation Status of British Mammals:  
686 Technical Summary. A report by the Mammal Society under contract to Natural England,  
687 Natural Resources Wales and Scottish Natural Heritage. Natural England, Peterborough.
- 688 Mazerolle, M. J. (2016). AICcmodavg: Model Selection and Multimodel Inference Based on  
689 (Q)AIC(c).
- 690 McLee, A. G., & Scaife, R. W. (1992). The colonisation by great crested newts (*Triturus*  
691 *crystatus*) of a water body following treatment with a piscicide to remove a large  
692 population of sticklebacks (*Gasterosteus aculeatus*). *Herpetological Bulletin*, **42**, 6–9.
- 693 Messenger, M. L., & Olden, J. D. (2018). Individual-based models forecast the spread and  
694 inform the management of an emerging riverine invader. *Diversity & Distributions*, **24**,  
695 1816–1829. <https://doi.org/10.1111/ddi.12829>
- 696 Nakagawa, H., Yamamoto, S., Sato, Y., Sado, T., Minamoto, T., & Miya, M. (2018). Comparing  
697 local- and regional-scale estimations of the diversity of stream fish using eDNA  
698 metabarcoding and conventional observation methods. *Freshwater Biology*, **63**, 569–580.  
699 <https://doi.org/10.1111/fwb.13094>
- 700 Oldham, R. S., Keeble, J., Swan, M. J. S., & Jeffcote, M. (2000). Evaluating the suitability of  
701 habitat for the great crested newt (*Triturus cristatus*). *The Herpetological Journal*, **10**,  
702 143–155.
- 703 Olds, B. P., Jerde, C. L., Renshaw, M. A., Li, Y., Evans, N. T., Turner, C. R., Deiner, K., Mahon,  
704 A. R., Brueske, M. A., Shirey, P. D., Pfrender, M. E., Lodge, D. M., & Lamberti, G. A.  
705 (2016). Estimating species richness using environmental DNA. *Ecology and Evolution*, **6**,  
706 4214–4226. <https://doi.org/10.1002/ece3.2186>
- 707 Paillisson, J. -M., & Marion, L. (2001). Interaction between coot (*Fulica atra*) and waterlily  
708 (*Nymphaea alba*) in a lake: the indirect impact of foraging. *Aquatic Botany*, **71**, 209–216.  
709 [https://doi.org/10.1016/S0304-3770\(01\)00182-6](https://doi.org/10.1016/S0304-3770(01)00182-6)
- 710 Perrow, M. R., Schutten, H. J., Howes, J. R., Holzer, T., Madgwick, F. J., & Jowitt, A. (1997).  
711 Interactions between coot (*Fulica atra*) and submerged macrophytes: the role of birds in  
712 the restoration process. *Hydrobiologia*, **342**, 241–255.  
713 <https://doi.org/10.1023/A:1017007911190>
- 714 Rannap, R., & Briggs, L. (2006). THE CHARACTERISTICS OF GREAT CRESTED NEWT TRITURUS  
715 CRISTATUS' BREEDING PONDS. Protection of the Great Crested Newt. Project Report. The  
716 experiences of LIFE-Nature project "Protection of *Triturus cristatus* in the Eastern Baltic  
717 Region" LIFE04NAT/EE/000070. Ministry of the Environment of the Republic of Estonia,  
718 Tallinn.
- 719 Rannap, R., Lõhmus, A., & Briggs, L. (2009a). Niche position, but not niche breadth, differs in  
720 two coexisting amphibians having contrasting trends in Europe. *Diversity & Distributions*,  
721 **15**, 692–700. <https://doi.org/10.1111/j.1472-4642.2009.00575.x>
- 722 Rannap, R., Lõhmus, A., & Briggs, L. (2009b). Restoring ponds for amphibians: a success  
723 story. *Hydrobiologia*, **634**, 87–95. <https://doi.org/10.1007/s10750-009-9884-8>
- 724 Rees, H. C., Maddison, B. C., Middleditch, D. J., Patmore, J. R. M., & Gough, K. C. (2014).  
725 REVIEW: The detection of aquatic animal species using environmental DNA—a review of  
726 eDNA as a survey tool in ecology. *Journal of Applied Ecology*, **51**, 1450–1459.  
727 <https://doi.org/10.1111/1365-2664.12306>

- 728 Riaz, T., Shehzad, W., Viari, A., Pompanon, F., Taberlet, P., & Coissac, E. (2011). ecoPrimers:  
729 inference of new DNA barcode markers from whole genome sequence analysis. *Nucleic*  
730 *Acids Research*, **39**, e145. <https://doi.org/10.1093/nar/gkr732> Port
- 731 Skei, J. K., Dolmen, D., Rønning, L., & Ringsby, T. H. (2006). Habitat use during the aquatic  
732 phase of the newts *Triturus vulgaris* (L.) and *T. cristatus* (Laurenti) in central Norway:  
733 proposition for a conservation and monitoring area. *Amphibia-Reptilia*, **27**, 309–324.  
734 <https://doi.org/10.1163/156853806778189972>
- 735 Stefanoudis, P. V., Sayer, C. D., Greaves, H. M., Davidson, T. A., Robson, H., Almeida, D., &  
736 Smith, E. (2017). Consequences of fish for cladoceran, water beetle and macrophyte  
737 communities in a farmland pond landscape: implications for conservation. *Fundamental*  
738 *and Applied Limnology*, **190**, 141–156. <https://doi.org/10.1127/fal/2017/1004>
- 739 Unglaub, B., Steinfartz, S., Drechsler, A., & Schmidt, B. R. (2015). Linking habitat suitability to  
740 demography in a pond-breeding amphibian. *Frontiers in Zoology*, **12**.  
741 <https://doi.org/10.1186/s12983-015-0103-3>
- 742 Ushio, M., Fukuda, H., Inoue, T., Makoto, K., Kishida, O., Sato, K., Murata, K., Nikaido, M.,  
743 Sado, T., Sato, Y., Takeshita, M., Iwasaki, W., Yamanaka, H., Kondoh, M. & Miya, M.  
744 (2017). Environmental DNA enables detection of terrestrial mammals from forest pond  
745 water. *Molecular Ecology Resources*, **17**, e63-e65. <https://doi.org/10.1111/1755-0998.12690>
- 746 Valentini, A., Taberlet, P., Miaud, C., Civade, R., Herder, J., Thomsen, P. F., Bellemain, E.,  
747 Besnard, A., Coissac, E., Boyer, F., Gaboriaud, C., Jean, P., Poulet, N., Roset, N., Copp, G.  
748 H., Geniez, P., Pont, D., Argillier, C., Baudoin, J. -M., Peroux, T., Crivelli, A. J., Olivier, A.,  
749 Acqueberge, M., Le Brun, M., Møller, P. R., Willerslev, E. & Dejean, T. (2016). Next-  
750 generation monitoring of aquatic biodiversity using environmental DNA metabarcoding.  
751 *Molecular Ecology*, **25**, 929–942. <https://doi.org/10.1111/mec.13428>
- 752 Vuorio, V., Heikkinen, R. K., & Tikkanen, O. -P. (2013). Breeding Success of the Threatened  
753 Great Crested Newt in Boreal Forest Ponds. *Annales Zoologici Fennici*, **50**, 158–169.  
754 <https://doi.org/10.5735/086.050.0303>
- 755 Wallau, G. L., Della-Flora, F., Bueno, A. S., Corso, J., Ortiz, M. F., & Cáceres, N. C. (2010).  
756 Behaviour of the Common Moorhen in Rio Grande do Sul, Brazil. *Acta Ethologica*, **13**,  
757 127–135. <https://doi.org/10.1007/s10211-010-0082-5>
- 758 Wickham, H. (2009). *ggplot2: Elegant Graphics for Data Analysis*. Springer New York, USA.
- 759 Wilcox, T. M., Young, M. K., McKelvey, K. S., Isaak, D. J., Horan, D. L. & Schwartz, M. K.  
760 (2018). Fine-scale environmental DNA sampling reveals climate-mediated interactions  
761 between native and invasive trout species. *Ecosphere*, **9**, e02500.  
762 <https://doi.org/10.1002/ecs2.2500>
- 763 Zhang, Z., Schwartz, S., Wagner, L., & Miller, W. (2000). A greedy algorithm for aligning DNA  
764 sequences. *Journal of Computational Biology*, **7**, 203–214.  
765 <https://doi.org/10.1089/10665270050081478>
- 766 Zuur, A. F., Ieno, E. N., Walker, N., Saveliev, A. A., & Smith, G. M. (2009). *Mixed effects*  
767 *models and extensions in ecology with R*. Springer New York, USA.  
768  
769

770 **Table 1.** Summary of biotic and abiotic determinants of *T. cristatus* occupancy. Reported  
 771 effects on *T. cristatus* occupancy in the literature and hypothesised effects on eDNA-based  
 772 *T. cristatus* occupancy are given for each determinant. Any determinants not reported in the  
 773 literature are listed as UNK. Direction of observed effects on eDNA-based *T. cristatus*  
 774 occupancy determined by each analysis (GLMM assessing species richness in each  
 775 vertebrate group,  $N = 532$ ; preliminary cooccur analysis,  $N = 532$ ; GLMM for biotic factors,  $n$   
 776 = 504; GLMM for abiotic factors  $n = 504$ ; and GLMM assessing HSI score,  $n = 504$ ) are given.  
 777 No, negative and positive effects are listed as 0, - and + respectively. For categorical  
 778 variables with more than one level, effect size and standard error (SE) are only given for  
 779 levels reported in the model summary. Test statistic is for LRT used and significant P-values  
 780 (<0.05) are in bold. Variables included for model selection but not retained in the final  
 781 model are listed as NR. The preliminary cooccur analysis was not applicable (NA) to abiotic  
 782 factors.  
 783

| Determinant         | Effect reported | Hypothesised effect | Analysis |                  |    |                  |          |                  |
|---------------------|-----------------|---------------------|----------|------------------|----|------------------|----------|------------------|
|                     |                 |                     | Cooccur  |                  |    | GLMM             |          |                  |
|                     |                 |                     | Effect   | P                | DF | Effect size (SE) | $\chi^2$ | P                |
| <b>Amphibians</b>   |                 |                     |          |                  |    |                  |          |                  |
| Species richness    | UNK             |                     |          |                  | 1  | 0.514 (0.148)    | 13.875   | <b>&lt;0.001</b> |
| <i>L. vulgaris</i>  | +               | +                   | +        | <b>&lt;0.001</b> | 1  | 1.624 (0.302)    | 50.899   | <b>&lt;0.001</b> |
| <i>B. bufo</i>      | UNK             |                     | -        | <b>0.010</b>     | 1  | -1.799 (0.659)   | 11.150   | <b>0.001</b>     |
| <b>Fish</b>         |                 |                     |          |                  |    |                  |          |                  |
| Species richness    | UNK             |                     |          |                  | 1  | -0.186 (0.123)   | 2.415    | <b>0.120</b>     |
| <i>G. aculeatus</i> | -               | -                   | -        | <b>0.012</b>     | 1  | -1.053 (0.469)   | 6.302    | <b>0.012</b>     |
| <i>C. carpio</i>    | -               | -                   | -        | <b>0.040</b>     | 1  | -1.463 (0.603)   | 7.841    | <b>0.005</b>     |
| <i>P. pungitius</i> | -               | -                   | -        | <b>0.049</b>     |    |                  | NR       |                  |
| <i>C. carassius</i> | -               | -                   |          |                  |    |                  |          |                  |

### Waterfowl

|                     |     |   |   |       |   |               |        |        |
|---------------------|-----|---|---|-------|---|---------------|--------|--------|
| Species richness    | UNK |   |   |       | 1 | 0.475 (0.141) | 12.715 | <0.001 |
| <i>G. chloropus</i> | UNK |   | + | 0.001 | 1 | 0.897 (0.251) | 15.705 | <0.001 |
| <i>F. atra</i>      | UNK |   | + | 0.022 |   |               | NR     |        |
| Waterfowl presence  | -   | - |   |       | 2 |               | 6.352  | 0.042  |
| Minor               |     |   |   |       |   | 0.534 (0.244) |        |        |
| Major               |     |   |   |       |   | 0.812 (0.506) |        |        |

### Terrestrial birds

|                     |     |  |   |       |   |                |       |       |
|---------------------|-----|--|---|-------|---|----------------|-------|-------|
| Species richness    | UNK |  |   |       | 1 | -0.046 (0.302) | 0.024 | 0.878 |
| <i>P. colchicus</i> | UNK |  | - | 0.050 |   |                |       |       |

### Terrestrial mammals

|                        |     |  |   |       |   |                |       |       |
|------------------------|-----|--|---|-------|---|----------------|-------|-------|
| Species richness       | UNK |  |   |       | 1 | -0.519 (0.193) | 8.599 | 0.007 |
| <i>S. carolinensis</i> | UNK |  | - | 0.020 |   |                |       |       |

|                         |     |   |    |    |   |                  |        |        |
|-------------------------|-----|---|----|----|---|------------------|--------|--------|
| <b>Pond area</b>        | -/+ | - | NA | NA | 1 | -0.0003 (0.0002) | 4.108  | 0.043  |
| <b>Pond density</b>     | +   | + | NA | NA |   |                  | NR     |        |
| <b>Pond depth</b>       | +   | + | NA | NA |   |                  | NR     |        |
| <b>Pond substrate</b>   | +   | + | NA | NA |   |                  | NR     |        |
| <b>Pond permanence</b>  | +   | + | NA | NA |   |                  | NR     |        |
| <b>Water quality</b>    | +   | + | NA | NA |   |                  | NR     |        |
| <b>Inflow Present</b>   | -   | - | NA | NA | 1 | -0.887 (0.249)   | 15.066 | <0.001 |
| <b>Outflow</b>          | UNK |   | NA | NA |   |                  | NR     |        |
| <b>Macrophyte cover</b> | -/+ | - | NA | NA |   |                  | NR     |        |
| <b>Shading</b>          | -/+ | - | NA | NA | 1 | -0.010 (0.003)   | 12.133 | <0.001 |
| <b>Woodland</b>         | +   | + | NA | NA |   |                  | NR     |        |

|                    |     |   |    |    |   |               |        |                  |
|--------------------|-----|---|----|----|---|---------------|--------|------------------|
| <b>Scrub/hedge</b> | +   | + | NA | NA |   |               |        | NR               |
| <b>Ruderals</b>    | UNK |   | NA | NA |   |               |        | NR               |
| <b>HSI score</b>   | 0/+ | + | NA | NA | 1 | 3.164 (0.798) | 17.039 | <b>&lt;0.001</b> |

---

784

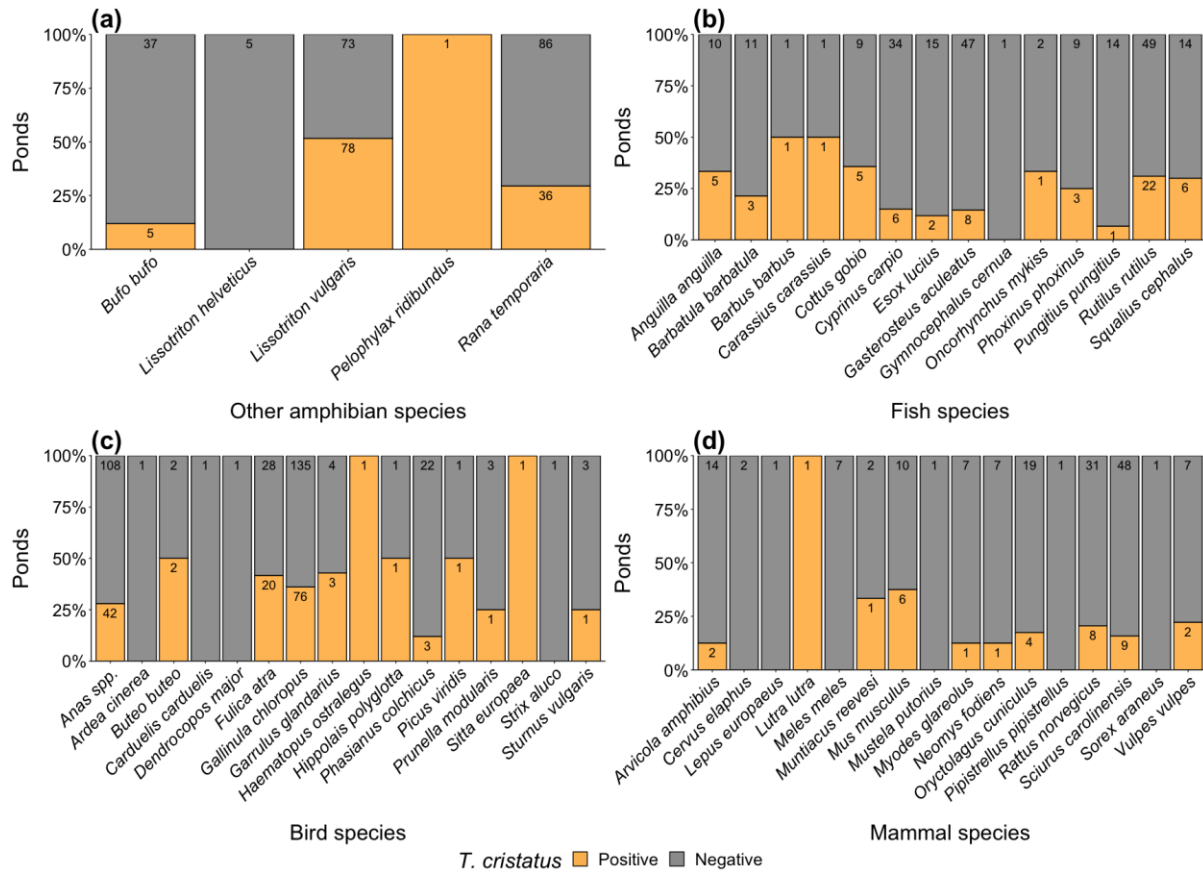

785

786 **Figure 1.** eDNA metabarcoding detection of *T. cristatus* in relation to other vertebrate  
 787 species ( $N = 532$  ponds): **(a)** other amphibians, **(b)** fish, **(c)** birds, and **(d)** mammals. Numbers  
 788 on each bar are the number of ponds with (orange) and without (grey) *T. cristatus* in which  
 789 a vertebrate species was detected.

790



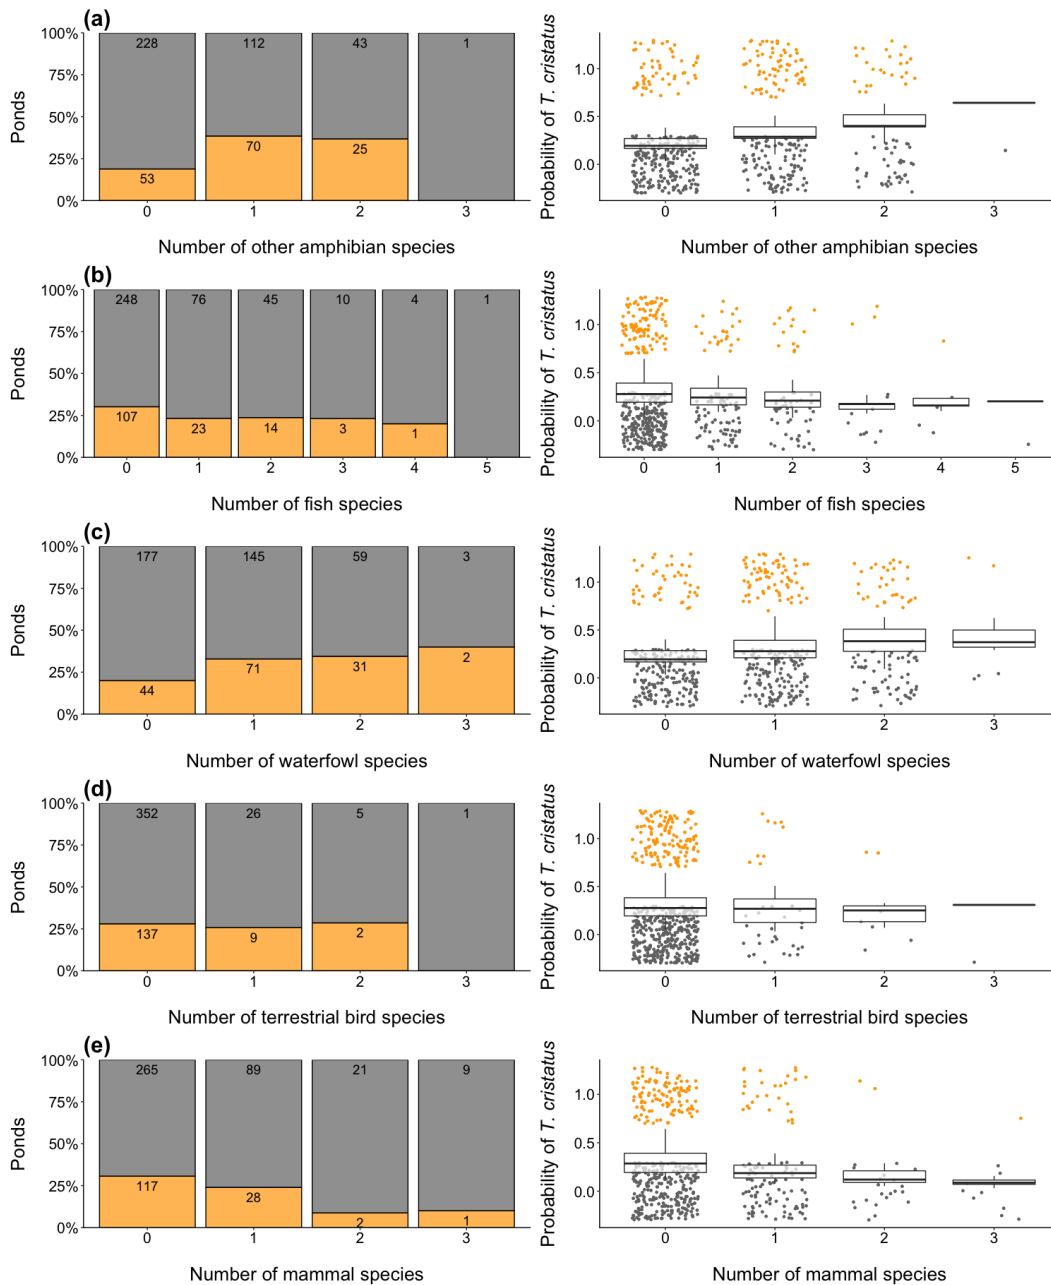

*T. cristatus* ■ Negative ■ Positive

791

792 **Figure 2.** *T. cristatus* presence (orange) and absence (grey) in relation to species richness of  
 793 different vertebrate groups ( $N = 532$  ponds): **(a)** other amphibians, **(b)** fish, **(c)** waterfowl,  
 794 **(d)** terrestrial birds, and **(e)** mammals. Observed proportion of ponds with and without *T.*  
 795 *cristatus* (left) is plotted alongside predicted probability of *T. cristatus* occupancy (right).  
 796 Numbers on barplots of observed occupancy are the number of ponds for each category. In  
 797 plots showing predicted *T. cristatus* occupancy, the observed data is shown as points  
 798 (jittered around 0 and 1 to clarify variation in point density) and boxes are the model  
 799 predictions.

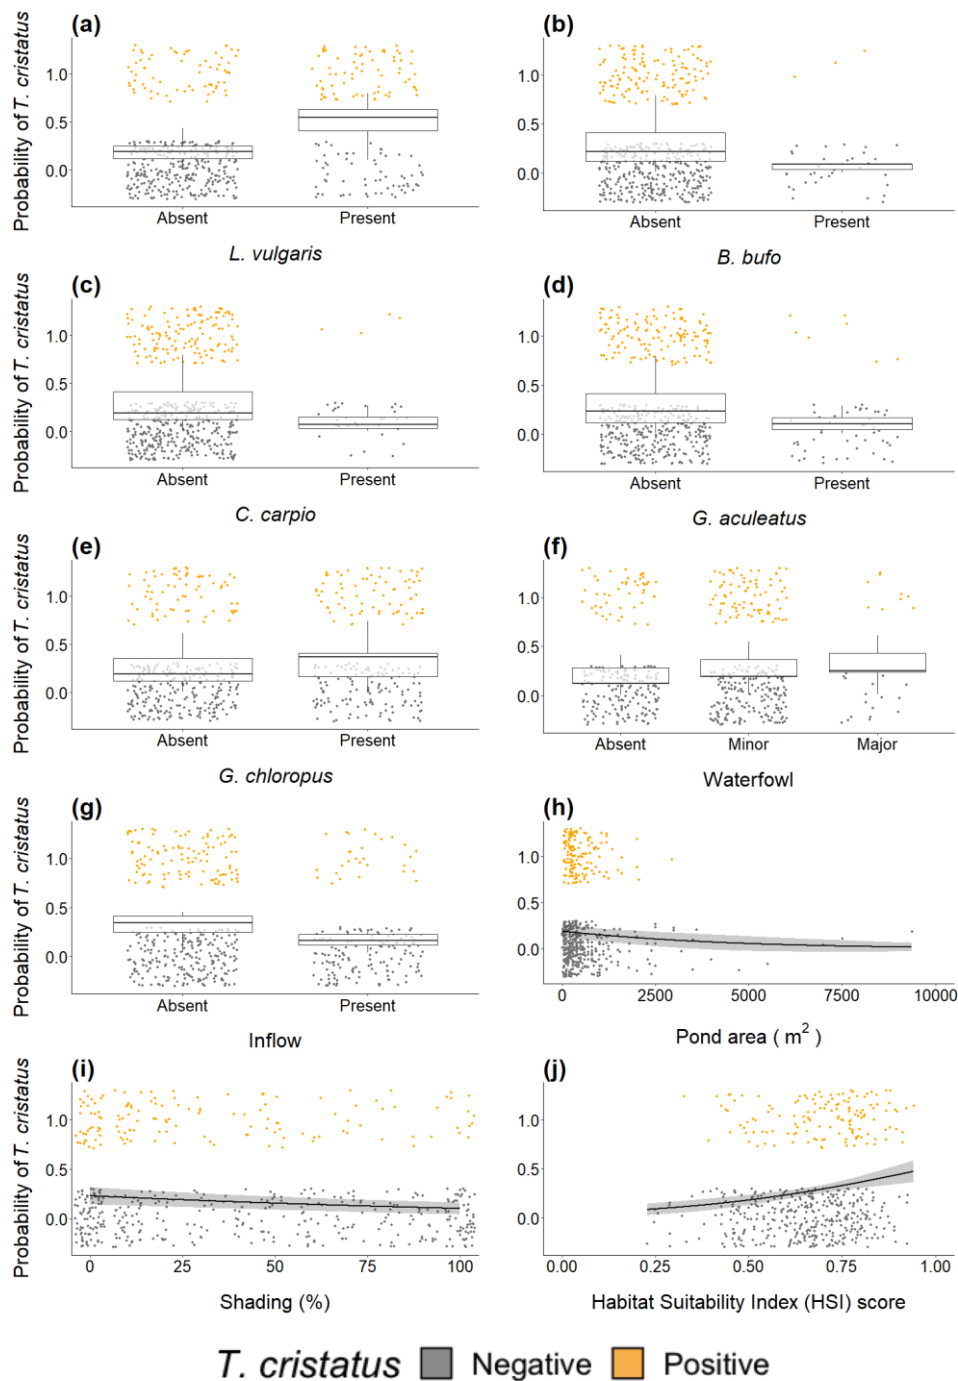

800

801 **Figure 3.** Biotic and abiotic determinants of *T. cristatus* occupancy ( $n = 504$  ponds): **(a)** *L.*  
 802 *vulgaris* occupancy, **(b)** *B. bufo* occupancy, **(c)** *C. carpio* occupancy, **(d)** *G. aculeatus*  
 803 occupancy, **(e)** *G. chloropus* occupancy, **(f)** extent of waterfowl presence, **(g)** presence of  
 804 inflow, **(h)** pond area, **(i)** percentage of shading, and **(j)** HSI score. The 95% CIs, as calculated  
 805 using the predicted *T. cristatus* probability values and standard error for these predictions,  
 806 are given for each relationship. The observed *T. cristatus* presence (orange) and absence  
 807 (grey) data are displayed as points (jittered around 0 and 1 to clarify variation in point  
 808 density) against the predicted relationships (boxes/lines).

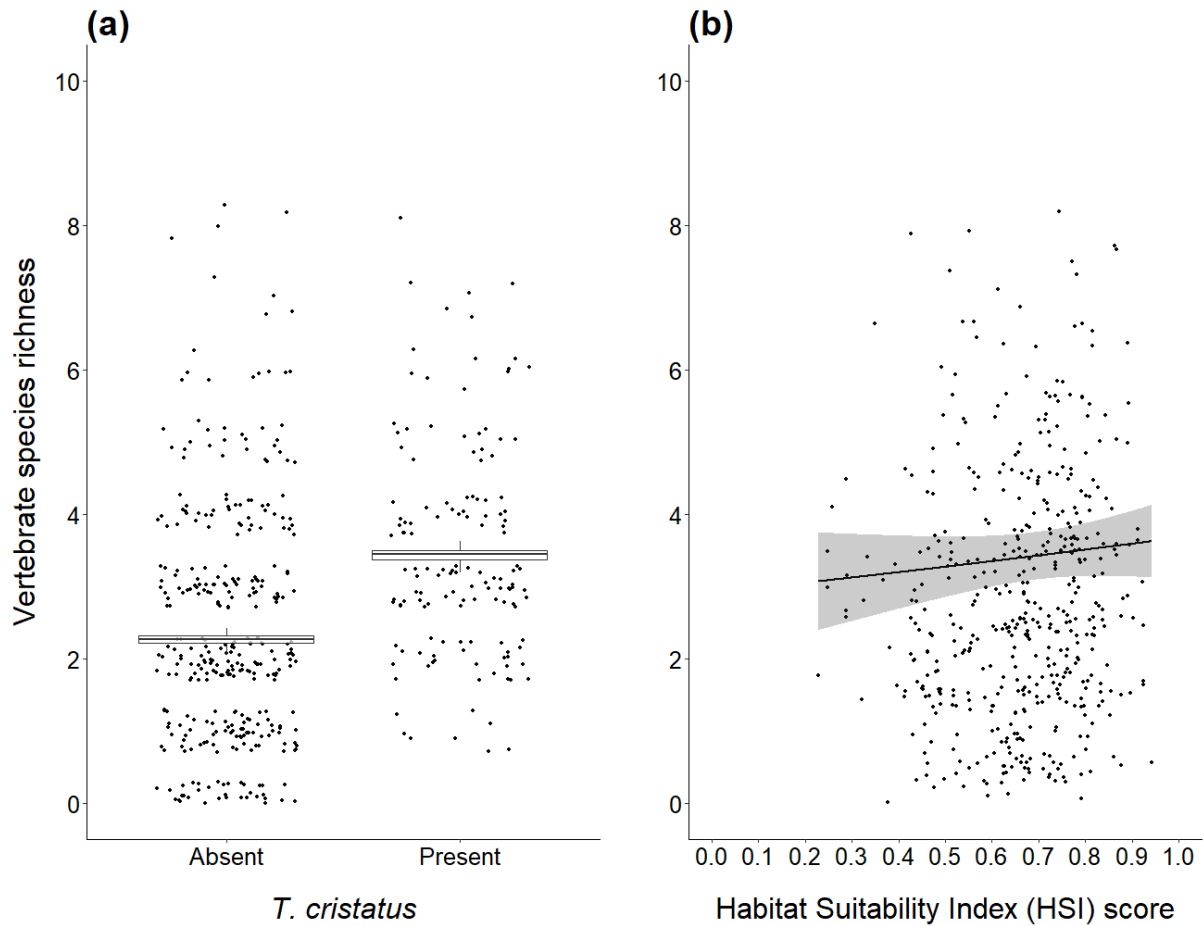

809

810

811 **Figure 4.** Vertebrate species richness in ponds ( $n = 504$ ) in relation to: **(a)** *T. cristatus*  
812 occupancy and **(b)** the *T. cristatus* HSI score. The 95% CIs, as calculated using the predicted  
813 species richness values and standard error for these predictions, are given for each  
814 relationship. The observed data are displayed as points (jittered to clarify variation in point  
815 density) against the predicted relationships (boxes/lines).

816
